# Supplementary material for: Exploring the Use of Washington Group Questions to Identify People with Clinical Impairments Who Need Services including Assistive Products: Results from Five Population-Based Surveys
Source: MDPI journal article supplement (doi:10.3390/ijerph19074304), 2022-04-03
Supplement: s1 [file s1]

**Table S1.** Agreement between Washington Group question responses and impairment severity level in each functional domain

| Washington Group question responses | Impairment levels |               |                   |                 |                                                         |
|-------------------------------------|-------------------|---------------|-------------------|-----------------|---------------------------------------------------------|
|                                     | None<br>N (%)     | Mild<br>N (%) | Moderate<br>N (%) | Severe<br>N (%) | Blind (vision only)<br>Profound (hearing only)<br>N (%) |
| Distance Vision Impairment          |                   |               |                   |                 |                                                         |
| India (n=3451)                      |                   |               |                   |                 |                                                         |
| No difficulty (n=2600)              | 2541 (97.73)      | 41 (1.58)     | 12 (0.46)         | 5 (0.19)        | 1 (0.04)                                                |
| Some (n=763)                        | 591 (77.46)       | 117 (15.33)   | 39 (5.11)         | 12 (1.57)       | 4 (0.52)                                                |
| A lot (n=87)                        | 37 (42.53)        | 5 (5.75)      | 20 (22.99)        | 16 (18.39)      | 9 (10.34)                                               |
| Cannot do (n=1)                     | 0 (0)             | 0 (0)         | 1 (100.00)        | 0 (0)           | 0 (0)                                                   |
| Cameroon (n=3314)                   |                   |               |                   |                 |                                                         |
| No difficulty (n=2601)              | 2584 (99.35)      |               | 15 (0.58)         | 1 (0.04)        | 1 (0.04)                                                |
| Some (n=659)                        | 619 (93.93)       |               | 28 (4.25)         | 7 (1.06)        | 5 (0.76)                                                |
| A lot (n=49)                        | 29 (59.18)        |               | 12 (24.29)        | 2 (4.08)        | 6 (12.24)                                               |
| Cannot do (n=5)                     | 0 (0)             |               | 0 (0)             | 0(0)            | 5 (100.00)                                              |
| The Gambia (n=9180)*                |                   |               |                   |                 |                                                         |
| No difficulty (n=6650)              | 6218 (93.5)       | 134 (2.02)    | 236 (3.55)        | 45 (0.68)       | 17 (0.26)                                               |
| Some (n=2351)                       | 1586 (67.46)      | 178 (7.57)    | 443 (18.84)       | 108 (4.59)      | 36 (1.53)                                               |
| A lot (n=160)                       | 53 (33.13)        | 13 (8.13)     | 44 (27.5)         | 17 (10.63)      | 33 (20.63)                                              |
| Cannot do (n=19)                    | 0 (0)             | 0 (0)         | 1 (5.26)          | 0 (0)           | 18 (94.74)                                              |
| Near Vision Impairment              |                   |               |                   |                 |                                                         |
| The Gambia (n=9175)**               | Can read          | Cannot read   |                   |                 |                                                         |
| No difficulty (n=6646)              | 3756 (56.52)      | 2890 (43.48)  |                   |                 |                                                         |
| Some (n=2350)                       | 628 (26.72)       | 1722 (73.28)  |                   |                 |                                                         |
| A lot (n=160)                       | 21 (13.13)        | 139 (86.88)   |                   |                 |                                                         |
| Cannot do (n=19)                    | 0 (0)             | 19 (100)      |                   |                 |                                                         |
| Hearing Impairment                  |                   |               |                   |                 |                                                         |
| India (n=3253)**                    |                   |               |                   |                 |                                                         |

|                                      |              |             |            |            |            |
|--------------------------------------|--------------|-------------|------------|------------|------------|
| No difficulty (n=2829)               | 2703 (95.55) | 100 (3.53)  | 22 (0.78)  | 4 (0.14)   | 0 (0)      |
| Some (n=335)                         | 228 (68.06)  | 57 (17.01)  | 41 (12.24) | 7 (2.09)   | 2 (0.60)   |
| A lot (n=86)                         | 10 (11.63)   | 3 (3.49)    | 41 (47.67) | 22 (25.58) | 10 (11.63) |
| Cannot do (n=3)                      | 0 (0)        | 0 (0)       | 0 (0)      | 0 (0)      | 3 (100)    |
| Cameroon (n=3005)**                  |              |             |            |            |            |
| No difficulty (n=2582)               | 2430 (94.11) | 117 (4.53)  | 34 (1.32)  | 1 (0.04)   | 0 (0)      |
| Some (n=390)                         | 295 (75.64)  | 48 (12.31)  | 36 (9.23)  | 8 (2.05)   | 3 (0.77)   |
| A lot (n=33)                         | 9 (27.27)    | 3 (9.09)    | 10 (30.30) | 6 (18.18)  | 5 (15.15)  |
| Cannot do (n=0)                      | 0 (0)        | 0 (0)       | 0 (0)      | 0 (0)      | 0 (0)      |
| Chile (n=492)                        |              |             |            |            |            |
| No difficulty (n=283)                | 195 (68.90)  | 70 (24.73)  | 15 (5.30)  | 3 (1.06)   | 0 (0.00)   |
| Some (n=173)                         | 67 (38.73)   | 69 (39.88)  | 32 (18.50) | 5 (2.89)   | 0 (0.00)   |
| A lot (n=34)                         | 5 (14.71)    | 4 (11.76)   | 18 (52.94) | 7 (20.59)  | 0 (0.00)   |
| Cannot do (n=2)                      | 0 (0.00)     | 0 (0.00)    | 0 (0.00)   | 0 (0.00)   | 2 (100)    |
| Mobility: Musculoskeletal Impairment |              |             |            |            |            |
| Cameroon (n=3308)                    |              |             |            |            |            |
| No difficulty (n=2466)               | 2332 (94.57) | 91 (3.69)   | 40 (1.62)  | 3 (0.12)   |            |
| Some (n=740)                         | 524 (70.81)  | 172 (23.24) | 44 (5.95)  | 0 (0)      |            |
| A lot (n=98)                         | 29 (29.59)   | 25 (25.51)  | 40 (40.82) | 4 (4.08)   |            |
| Cannot do (n=4)                      | 0 (0)        | 0 (0)       | 2 (50.00)  | 2 (50.00)  |            |
| India (n=3439)                       |              |             |            |            |            |
| No difficulty (n=2707)               | 2460 (90.88) | 227 (8.39)  | 16 (0.59)  | 4 (0.15)   |            |
| Some (n=611)                         | 277 (45.34)  | 307 (50.25) | 19 (3.11)  | 8 (1.31)   |            |
| A lot (n=107)                        | 8 (7.48)     | 37 (34.58)  | 39 (36.45) | 23 (21.50) |            |
| Cannot do (n=14)                     | 0 (0.00)     | 0 (0.00)    | 6 (42.86)  | 8 (5.14)   |            |
| Turkey (n=3014)                      |              |             |            |            |            |
| No difficulty (n=2455)               | 2336 (88.18) | 42 (38.18)  | 60 (32.43) | 17 (24.29) |            |
| Some (n=407)                         | 281 (10.61)  | 33 (30.00)  | 72 (38.92) | 21 (30.00) |            |
| A lot (n=129)                        | 30 (1.13)    | 34 (30.91)  | 45 (24.32) | 20 (28.57) |            |
| Cannot do (n=23)                     | 2 (0.08)     | 1 (0.91)    | 8 (4.32)   | 12 (17.14) |            |

| Cognitive Impairment |             |            |  |
|----------------------|-------------|------------|--|
| Chile (n=534)        |             |            |  |
| No difficulty (n=96) | 84 (87.50)  | 12 (12.50) |  |
| Some (n=349)         | 313 (89.68) | 36 (10.32) |  |
| A lot (n=88)         | 67 (76.14)  | 21 (23.86) |  |
| Cannot do (n=1)      | 0 (0)       | 1 (100.00) |  |

\*8 participants were missing WG data; + Near vision test not possible for 5 participants; \*\* Limited to participants  $\geq 4$  years old with complete PTA; in Cameroon, 11 survey participants were missing WG data.

**Table S2:** Proportion of participants assessed to have a clinical impairment who need interventions as identified by Washington Group questions

| Domain                                      | Washington Group Questions          |               |                  |                   |                                   |               |                  |                   |
|---------------------------------------------|-------------------------------------|---------------|------------------|-------------------|-----------------------------------|---------------|------------------|-------------------|
|                                             | Need surgical/medical intervention* |               |                  |                   | Need rehabilitation services/APs* |               |                  |                   |
|                                             | Total                               | No difficulty | Some+ Difficulty | A lot+ difficulty | Total                             | No difficulty | Some+ Difficulty | A lot+ difficulty |
|                                             | N                                   | %             | %                | %                 | N                                 | %             | %                | %                 |
| <b>Mild+ Visual Impairment &lt;6/12</b>     |                                     |               |                  |                   |                                   |               |                  |                   |
| - India (n=282)                             | 129                                 | 18%           | 82%              | 33%               | 153                               | 26%           | 74%              | 5%                |
| - The Gambia (n=1323)                       | 785                                 | 27%           | 73%              | 13%               | 655                               | 38%           | 62%              | 8%                |
| <b>Moderate+ Visual Impairment &lt;6/18</b> |                                     |               |                  |                   |                                   |               |                  |                   |
| - Cameroon (n=82^)                          | 63                                  | 16%           | 84%              | 32%               | 55                                | 27%           | 73%              | 33%               |
| - India (n=119)                             | 103                                 | 15%           | 85%              | 40%               | 17                                | 24%           | 76%              | 29%               |
| - The Gambia (n=998)                        | 726                                 | 26%           | 74%              | 14%               | 381                               | 35%           | 65%              | 10%               |
| <b>Near Vision Impairment</b>               |                                     |               |                  |                   |                                   |               |                  |                   |
| - The Gambia (n=4770)                       |                                     |               |                  |                   | 4770                              | 61%           | 39%              | 3%                |
| <b>Mild+ Hearing Impairment</b>             |                                     |               |                  |                   |                                   |               |                  |                   |
| - Chile (n=225)                             | 30                                  | 23%           | 77%              | 23%               | 211                               | 40%           | 60%              | 13%               |
| <b>Moderate+ Hearing Impairment</b>         |                                     |               |                  |                   |                                   |               |                  |                   |
| - Cameroon (n=103)                          | 34                                  | 38%           | 62%              | 12%               | 55                                | 33%           | 67%              | 25%               |
| - Chile (n=82)                              | 16                                  | 6%            | 94%              | 44%               | 78                                | 23%           | 77%              | 31%               |
| - India (n=153)                             | 25                                  | 4%            | 96%              | 64%               | 140                               | 18%           | 82%              | 50%               |
| <b>Mobility: Mild+ MSI</b>                  |                                     |               |                  |                   |                                   |               |                  |                   |
| - Cameroon (n=423)                          | 276                                 | 30%           | 70%              | 17%               | 296                               | 25%           | 75%              | 20%               |
| - India (n=694)                             | 349                                 | 36%           | 64%              | 18%               | 304                               | 35%           | 65%              | 19%               |
| - Turkey (n=365)                            | 187                                 | 30%           | 70%              | 34%               | 318                               | 31%           | 69%              | 34%               |
| <b>Mobility: Moderate+ MSI</b>              |                                     |               |                  |                   |                                   |               |                  |                   |
| - Cameroon (n=135)                          | 94                                  | 32%           | 68%              | 36%               | 96                                | 22%           | 78%              | 44%               |
| - India (n=123)                             | 70                                  | 11%           | 89%              | 60%               | 66                                | 14%           | 86%              | 62%               |
| - Turkey (n=255)                            | 136                                 | 28%           | 72%              | 34%               | 230                               | 30%           | 70%              | 34%               |

\* Some participants were assessed to need both surgical/medical and rehabilitation/APs interventions/services; ^ 2 participants who were clinically assessed to have moderate vision impairment did not have a cause of vision impairment assigned.

**Table S3:** Overall proportion of survey participants who were assessed to have a clinical impairment and need interventions

| Domain                                      | Washington Group Questions* |                                    |                                 |
|---------------------------------------------|-----------------------------|------------------------------------|---------------------------------|
|                                             | Total population            | Need medical/surgical intervention | Need rehabilitation services/AP |
|                                             | N                           | N (%)                              | N (%)                           |
| <b>Mild+ Visual Impairment &lt;6/12</b>     |                             |                                    |                                 |
| - India (n=282)                             | 3451                        | 129 (4%)                           | 153 (4%)                        |
| - The Gambia (n=1323)                       | 9180                        | 785 (9%)                           | 655 (7%)                        |
| <b>Moderate+ Visual Impairment &lt;6/18</b> |                             |                                    |                                 |
| - Cameroon (n=82 <sup>^</sup> )             | 3314                        | 63 (2%)                            | 55 (2%)                         |
| - India (n=119)                             | 3451                        | 103 (3%)                           | 17 (<1%)                        |
| - The Gambia (n=998)                        | 9180                        | 726 (8%)                           | 381 (4%)                        |
| <b>Mild+ Hearing Impairment</b>             |                             |                                    |                                 |
| - Chile (n=225)                             | 492                         | 30 (6%)                            | 211 (43%)                       |
| <b>Moderate+ Hearing Impairment</b>         |                             |                                    |                                 |
| - Cameroon (n=103)                          | 3005                        | 34 (1%)                            | 55 (2%)                         |
| - Chile (n=82)                              | 492                         | 16 (3%)                            | 78 (16%)                        |
| - India (n=153)                             | 3253                        | 25 (1%)                            | 140 (4%)                        |
| <b>Mobility: Mild+ MSI</b>                  |                             |                                    |                                 |
| - Cameroon (n=423)                          | 3308                        | 276 (8%)                           | 296 (9%)                        |
| - India (n=694)                             | 3439                        | 349 (10%)                          | 304 (9%)                        |
| - Turkey (n=365)                            | 3014                        | 187 (6%)                           | 318 (11%)                       |
| <b>Mobility: Moderate+ MSI</b>              |                             |                                    |                                 |
| - Cameroon (n=135)                          | 3308                        | 94 (3%)                            | 96 (3%)                         |
| - India (n=123)                             | 3439                        | 70 (2%)                            | 66 (2%)                         |
| - Turkey (n=255)                            | 3014                        | 136 (5%)                           | 230 (8%)                        |

\*Analysis was restricted to those participants who answered Washington Group questions; <sup>^</sup>2 participants who were clinically assessed to have moderate vision impairment did not have a cause of vision impairment assigned.

**Table S4:** Relationship between clinical impairment assessed need\* for four priority assistive products (glasses, hearing aids, wheelchairs and prostheses) and Washington Group responses in three functional domains.

|            | Washington Group Questions |                |                 |                    |                |                 |                     |                |                 |                   |                |                 |                        |                |                 |
|------------|----------------------------|----------------|-----------------|--------------------|----------------|-----------------|---------------------|----------------|-----------------|-------------------|----------------|-----------------|------------------------|----------------|-----------------|
|            | VISION                     |                |                 |                    |                |                 | HEARING             |                |                 | MOBILITY          |                |                 |                        |                |                 |
|            | Needs distance glasses     |                |                 | Needs near glasses |                |                 | Needs hearing aid** |                |                 | Needs wheelchair  |                |                 | Needs UL/LL prosthesis |                |                 |
|            | No diff. ^<br>N (%)        | Some+<br>N (%) | A lot+<br>N (%) | No diff.<br>N (%)  | Some+<br>N (%) | A lot+<br>N (%) | No diff.<br>N (%)   | Some+<br>N (%) | A lot+<br>N (%) | No diff.<br>N (%) | Some+<br>N (%) | A lot+<br>N (%) | No diff.<br>N (%)      | Some+<br>N (%) | A lot+<br>N (%) |
| Cameroon   |                            |                |                 |                    |                |                 |                     |                |                 |                   |                |                 |                        |                |                 |
| Mild+      |                            |                |                 |                    |                |                 |                     |                |                 | 0<br>0%           | 4<br>100%      | 4<br>100%       | 0<br>0%                | 1<br>100%      | 0<br>0%         |
| Moderate+  | 7<br>41%                   | 10<br>59%      | 5<br>29%        |                    |                |                 | 10<br>28%           | 26<br>72%      | 8<br>22%        | 0<br>0%           | 4<br>100%      | 4<br>100%       | 0<br>0%                | 1<br>100%      | 0<br>0%         |
| Chile      |                            |                |                 |                    |                |                 |                     |                |                 |                   |                |                 |                        |                |                 |
| Mild+      |                            |                |                 |                    |                |                 | 85<br>40%           | 126<br>60%     | 28<br>13%       |                   |                |                 |                        |                |                 |
| Moderate+  |                            |                |                 |                    |                |                 | 18<br>23%           | 60<br>77%      | 24<br>31%       |                   |                |                 |                        |                |                 |
| India      |                            |                |                 |                    |                |                 |                     |                |                 |                   |                |                 |                        |                |                 |
| Mild+      | 34<br>24%                  | 110<br>76%     | 7<br>5%         |                    |                |                 |                     |                |                 | 1<br>50%          | 1<br>50%       | 1<br>50%        | 1<br>50%               | 1<br>50%       | 1<br>50%        |
| Moderate+  | 3<br>19%                   | 13<br>81%      | 5<br>31%        |                    |                |                 | 20<br>19%           | 85<br>81%      | 54<br>51%       | 1<br>50%          | 1<br>50%       | 1<br>50%        | 1<br>50%               | 1<br>50%       | 1<br>50%        |
| The Gambia |                            |                |                 |                    |                |                 |                     |                |                 |                   |                |                 |                        |                |                 |
| Mild+      | 214<br>40%                 | 315<br>60%     | 22<br>4%        | 2643<br>66%        | 1359<br>34%    | 59<br>1%        |                     |                |                 |                   |                |                 |                        |                |                 |
| Moderate+  | 163<br>39%                 | 260<br>61%     | 17<br>4%        |                    |                |                 |                     |                |                 |                   |                |                 |                        |                |                 |
| Turkey     |                            |                |                 |                    |                |                 |                     |                |                 |                   |                |                 |                        |                |                 |
| Mild+      |                            |                |                 |                    |                |                 |                     |                |                 | 0                 | 9              | 6               | 0                      | 2              | 2               |

|           |  |    |      |     |    |      |      |
|-----------|--|----|------|-----|----|------|------|
|           |  | 0% | 100% | 67% | 0% | 100% | 100% |
| Moderate+ |  | 0  | 9    | 6   | 0  | 2    | 2    |
|           |  | 0% | 100% | 67% | 0% | 100% | 100% |

Abbreviations: diff.= difficulty, UL/LL=upper limb/lower limb; \* "Need" includes both "unmet need" and "undermet need" for each assistive product; ^ Denominator includes participants who needed specific assistive product and who completed Washington Group questions in the respective functional domain; \*\* Hearing aid need includes all participants who need a referral for audiological services and likely hearing aid need.
